# Supplementary material for: Analysis of Psychological Symptoms Following Disclosure of Amyloid–Positron Emission Tomography Imaging Results to Adults With Subjective Cognitive Decline
Source: PubMed Central journal article supplement (PMC9857261; doi:10.1001/jamanetworkopen.2022.50921), 2023-01-13
Supplement: jamanetwopen-e2250921-s003.pdf [file jamanetwopen-e2250921-s003.pdf]

## Data Sharing Statement

Caprioglio. Analysis of Psychological Symptoms Following Disclosure of Amyloid-Positron Emission Tomography Imaging Results to Adults With Subjective Cognitive Decline. *JAMA Netw Open*. Published January 13, 2023. doi:10.1001/jamanetworkopen.2022.50921

### Data

**Data available:** Yes

**Data types:** Deidentified participant data, Data dictionary

**How to access data:** Anonymized data collected for the study and additional documents (e.g. study protocol, informed consent form) may be made available to others upon request and after the approval of a proposal by the AMYPAD consortium.

**When available:** With publication

### Supporting Documents

**Document types:** None

### Additional Information

**Who can access the data:** Data will be made available to anyone requesting the data, upon request and after the approval of a proposal by the AMYPAD consortium.

**Types of analyses:** Data will be made available for any purpose, upon request and after the approval of a proposal by the AMYPAD consortium.

**Mechanisms of data availability:** Data will be made available upon request and after the approval of a proposal by the AMYPAD consortium.
